# Supplementary material for: Continuous Neuromuscular Blockade Following Successful Resuscitation From Cardiac Arrest: A Randomized Trial
Source: PubMed Central journal article supplement — J Am Heart Assoc. 2020 Aug 27;9(17):e017171. doi: 10.1161/JAHA.120.017171 (PMC7660770; doi:10.1161/jaha.120.017171), 2020-08-27
Supplement: JAH3-9-e017171-s001.pdf [file JAH3-9-e017171-s001.pdf]

# **SUPPLEMENTAL MATERIAL**

**Table S1. Enrollment by study site.**

| Site                                    | Number screened | Number enrolled |
|-----------------------------------------|-----------------|-----------------|
| Beth Israel Deaconess Medical Center    | 255             | 46              |
| University of Pittsburgh Medical Center | 375             | 16              |
| Brigham and Women's Hospital            | 109             | 8               |
| Beaumont Hospital                       | 45              | 11              |
| University of Alabama                   | 34              | 2               |

\*The University of Pittsburgh Mercy Hospital participated in screening towards the end of the trial, but did not enroll any patients.

**Table S2. Protocol Amendment Summary.**

| Change                                                                                            | Date      | Rationale                                                                                                                                                                 |
|---------------------------------------------------------------------------------------------------|-----------|---------------------------------------------------------------------------------------------------------------------------------------------------------------------------|
| Inclusion criteria changed from enrollment within 6 hours of ROSC to within 6 hours of TTM start. | 11/12/14  | Few patients were able to be consented and fully enrolled within 6 hours of ROSC                                                                                          |
| Exclusion criteria removed for patients not breathing over the set ventilator rate removed.       | 8/18/2015 | Difficulty determining a patient's ability to breath over the set ventilator rate. Concerns regarding the potential influence of sedation.                                |
| Inclusion criteria of serum lactate >2mmol/L added.                                               | 02/13/17  | Concern that patients enrolled with low lactate levels would be at low likelihood to benefit from the intervention with respect to the primary outcome of lactate change. |

**Table S3. Sedative and Paralytic Use.**

|                                        | NMB                |              |               | Usual Care         |              |               |
|----------------------------------------|--------------------|--------------|---------------|--------------------|--------------|---------------|
| Sedation and Analgesia, n(%) receiving | ROSC-Enroll (n=37) | 0-12h (n=37) | 12-24h (n=37) | ROSC-Enroll (n=43) | 0-12h (n=43) | 12-24h (n=42) |
| Propofol                               | 14 (38)            | 19 (51)      | 19 (51)       | 26 (61)            | 31 (72)      | 29 (67)       |
| Midazolam                              | 21 (57)            | 20 (54)      | 18 (49)       | 17 (40)            | 16 (37)      | 15 (36)       |
| Lorazepam                              | 3 (8)              | 2 (3)        | 3 (8)         | 2 (5)              | 1 (2)        | 0 (0)         |
| Dexmedetomidine                        | 0 (0)              | 0 (0)        | 0 (0)         | 0 (0)              | 0 (0)        | 0 (0)         |
| Fentanyl                               | 28 (76)            | 32 (87)      | 33 (89)       | 31 (72)            | 31 (72)      | 28 (67)       |
| Paralytic, n(%) receiving              |                    |              |               |                    |              |               |
| Rocuronium                             | 4 (11)             |              |               | 0 (0)              | 1 (2)        | 2 (5)         |
| Vecuronium                             | 2 (5)              |              |               | 1 (2)              | 1 (2)        | 1 (2)         |
| Cisatracurium                          | 0 (0)              |              |               | 1 (2)              | 4 (9)        | 5 (12)        |

**Figure S1. Subgroup Analyses.**

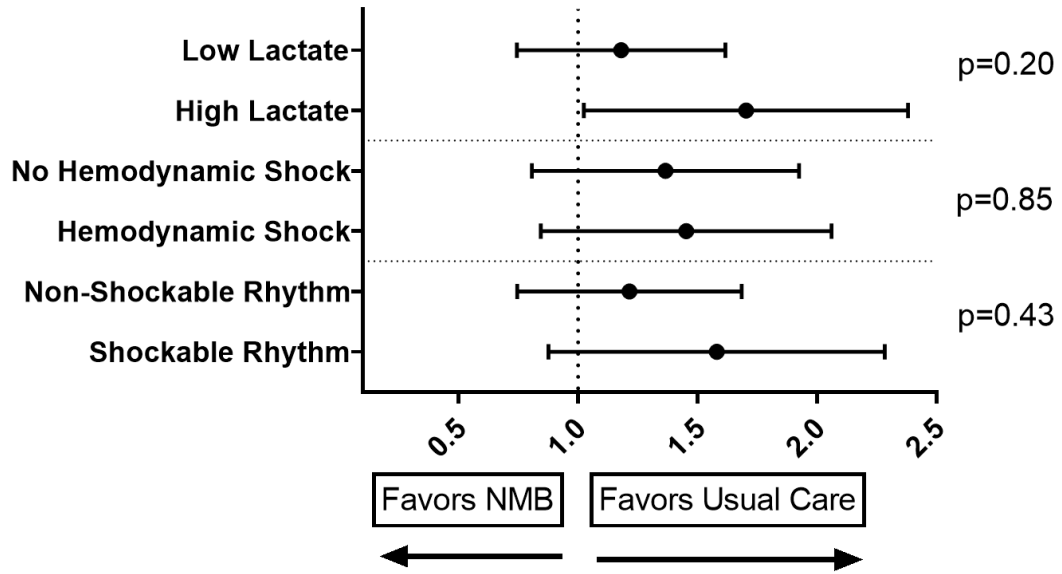

Effect estimates reflect the ratio of geometric mean differences. p-values reflect the relevant interaction term.

**Figure S2. Inflammatory Biomarkers over Time.**

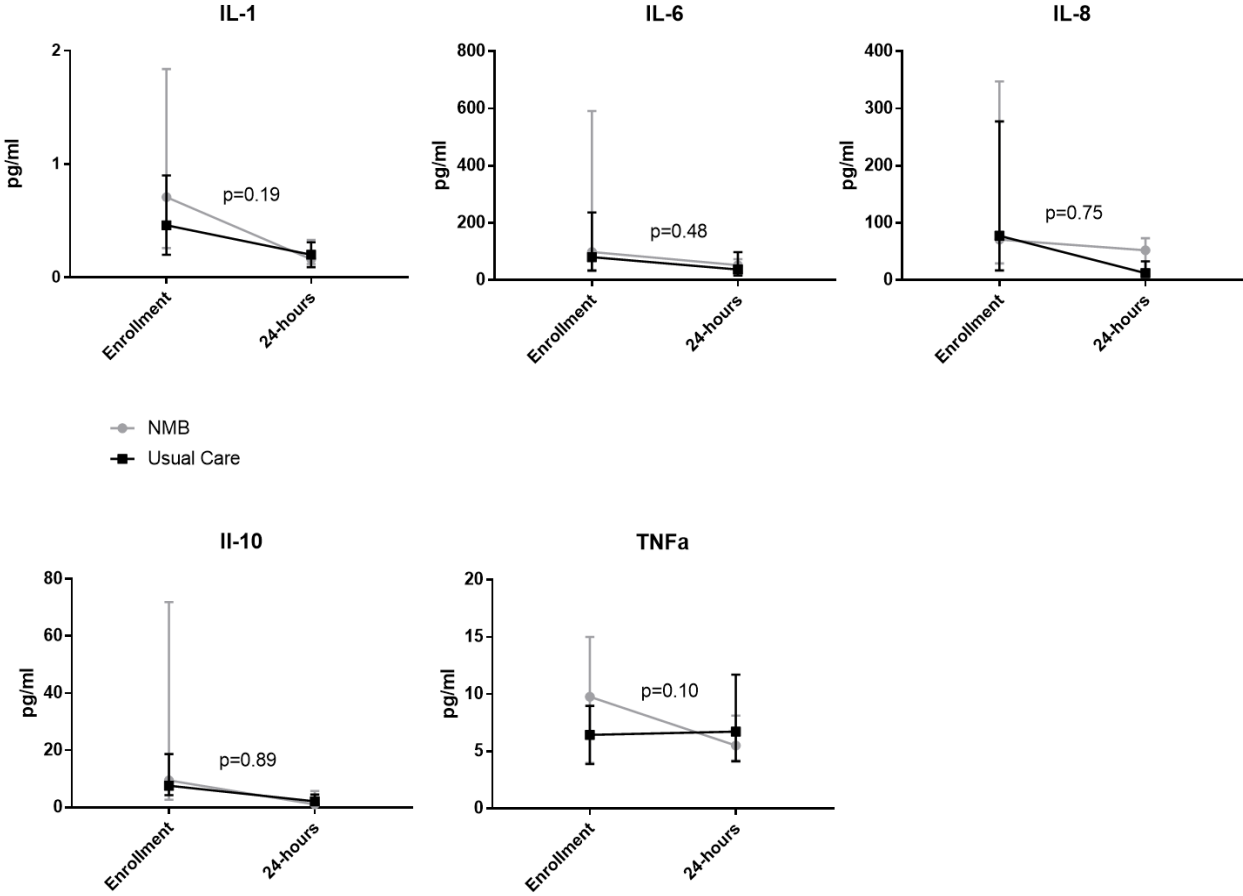

Change in biomarker levels over time assessed via linear mixed model. Biomarker values log-transformed for the analysis as their distributions visually deviated from normal. p-values reflect the interaction between randomization group and time.

**Figure S2. Endothelial and Vascular Biomarkers over Time.**

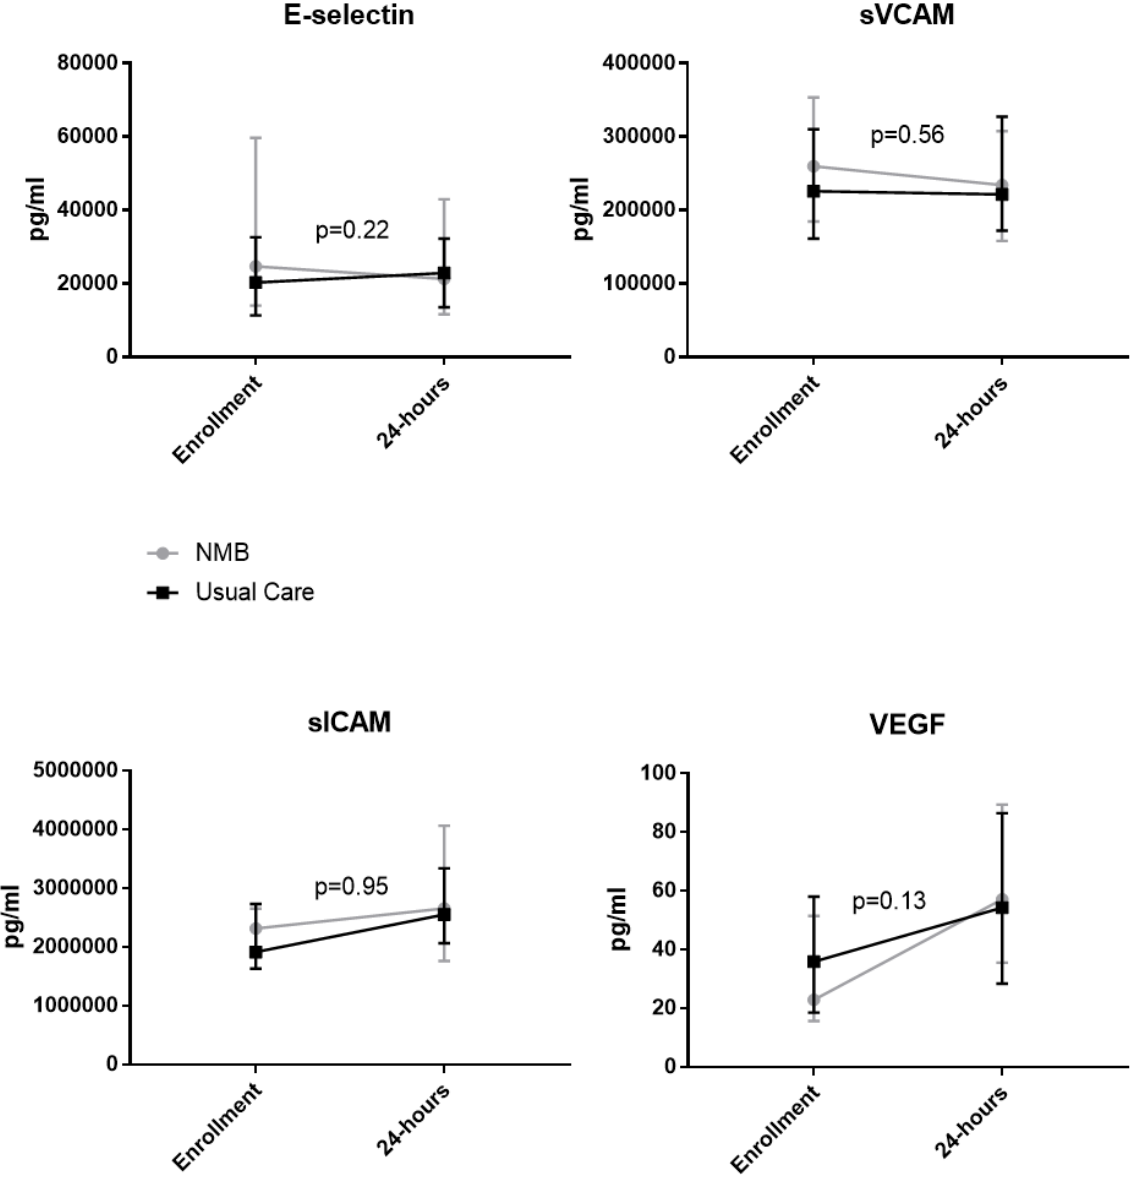

Change in biomarker levels over time assessed via linear mixed model. Biomarker values log-transformed for the analysis as their distributions visually deviated from normal. p-values reflect the interaction between randomization group and time.

**Figure S3. Biomarkers of Renal Injury over Time.**

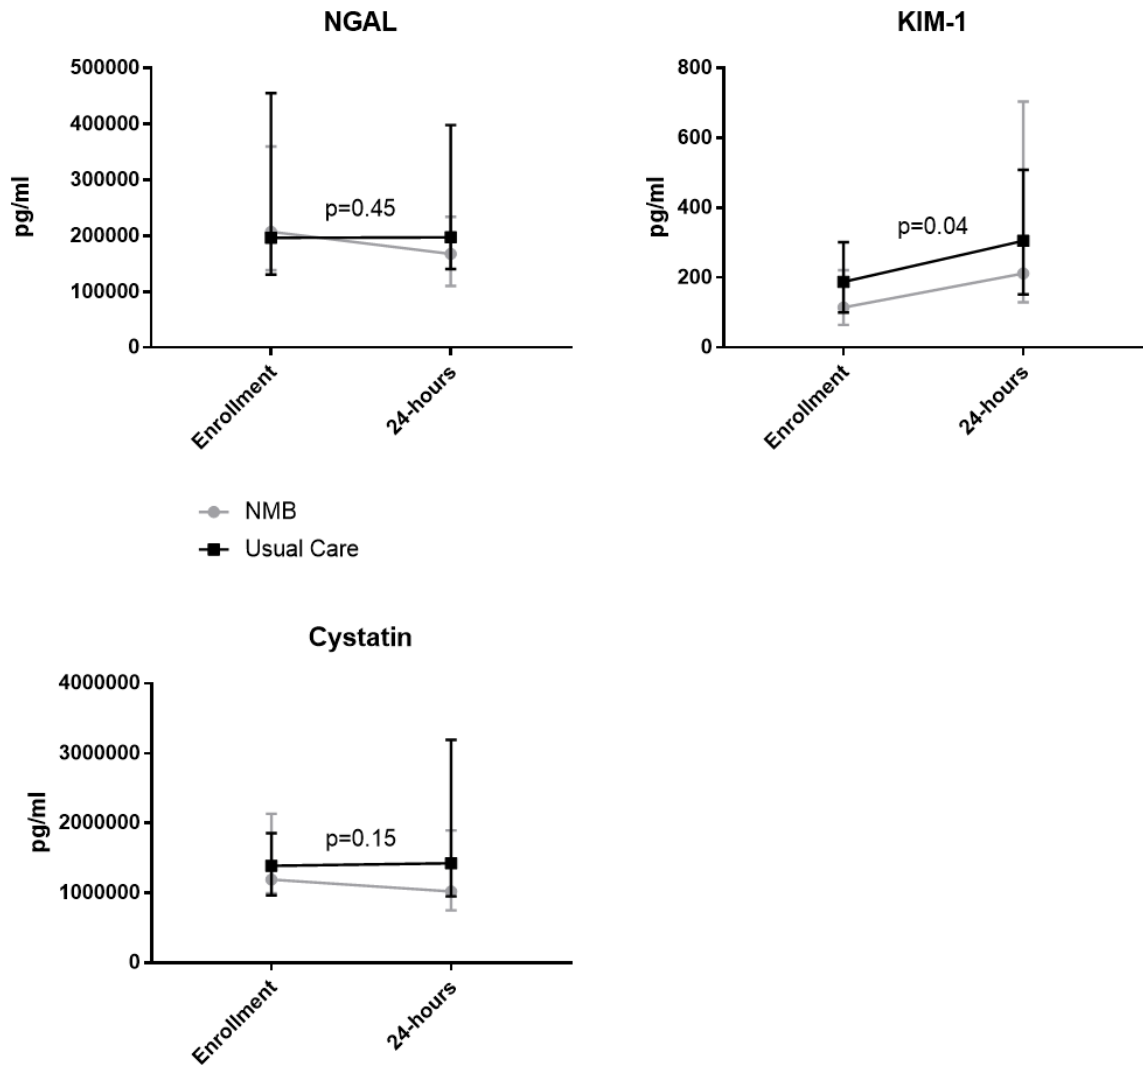

Change in biomarker levels over time assessed via linear mixed model. Biomarker values log-transformed for the analysis as their distributions visually deviated from normal. p-values reflect the interaction between randomization group and time.
